# Supplementary material
Source: PubMed Central journal article supplement (PMC8115040)
Supplement: 41386_2020_839_MOESM6_ESM.pdf [file 41386_2020_839_MOESM6_ESM.pdf]

Females +0

Vehicle

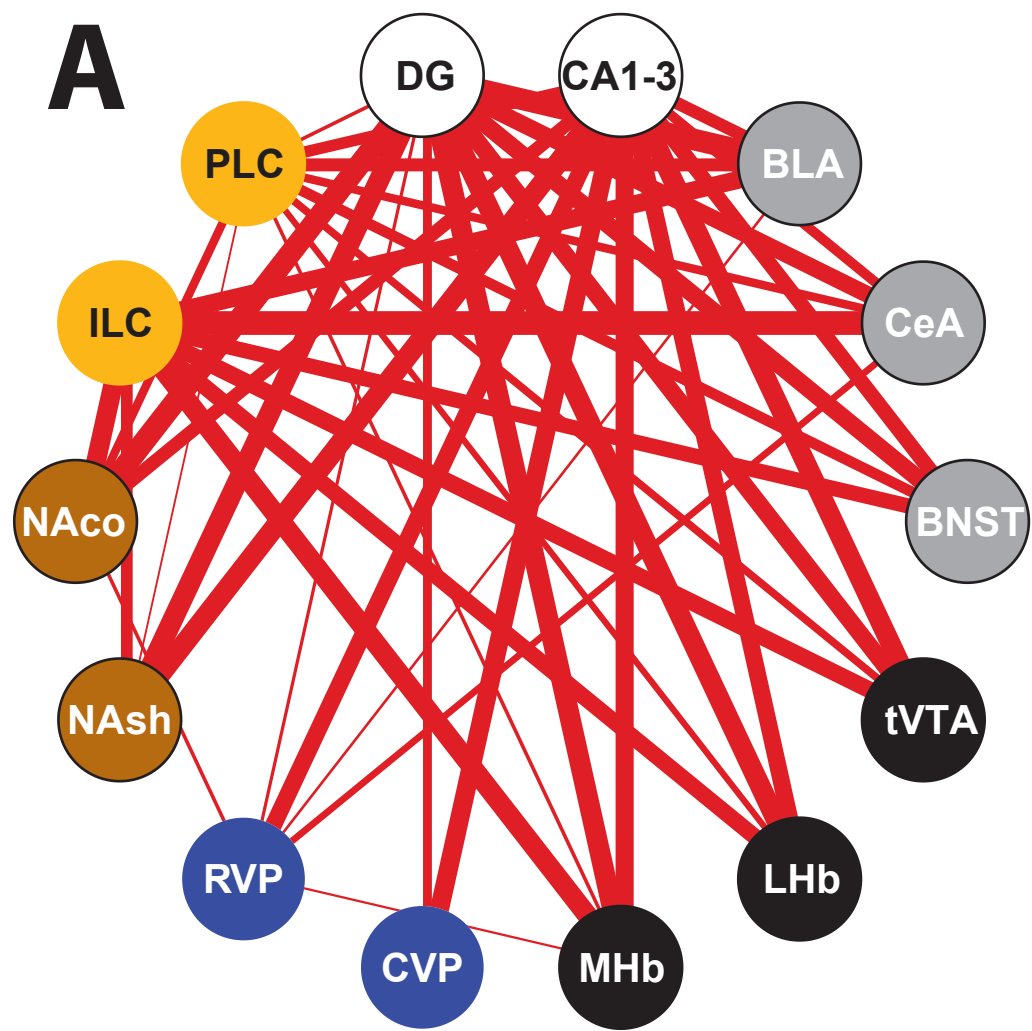

0.5 THC  
mg/kg

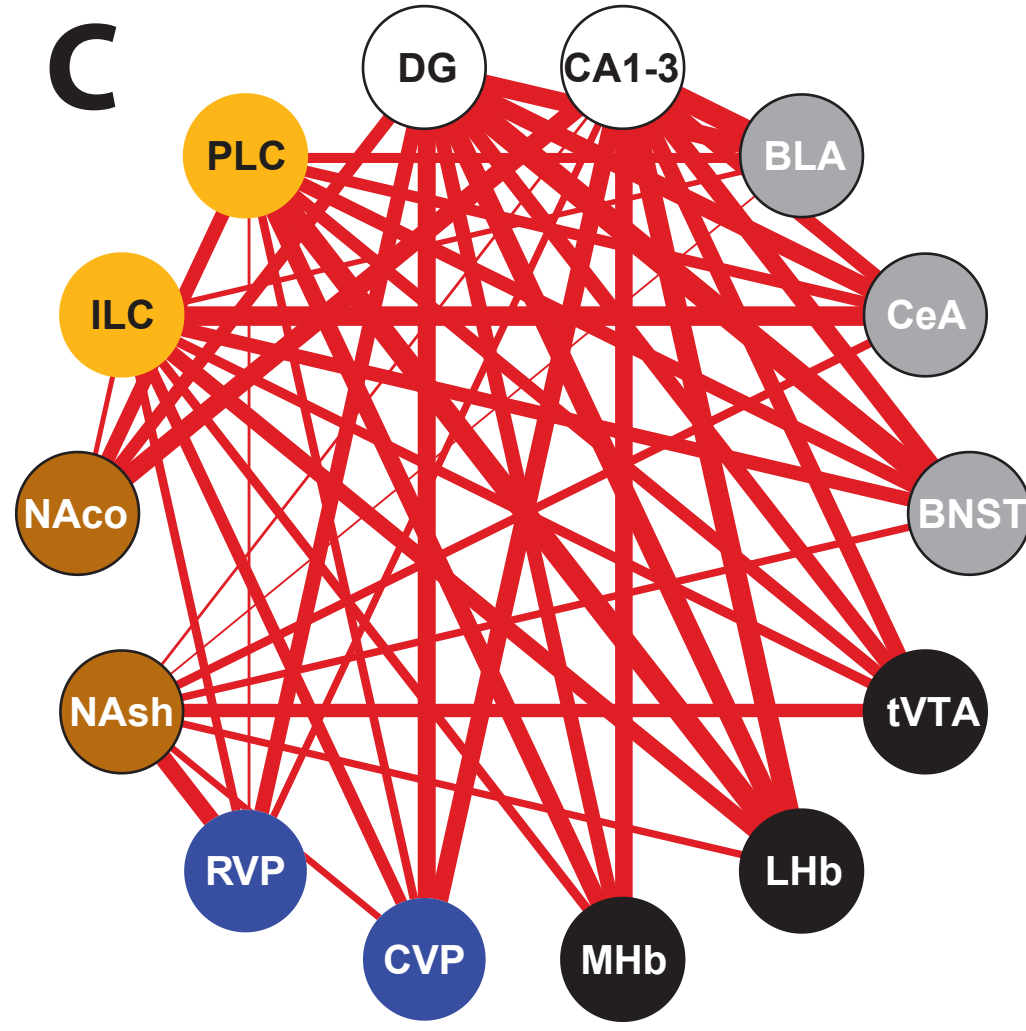

5 THC  
mg/kg

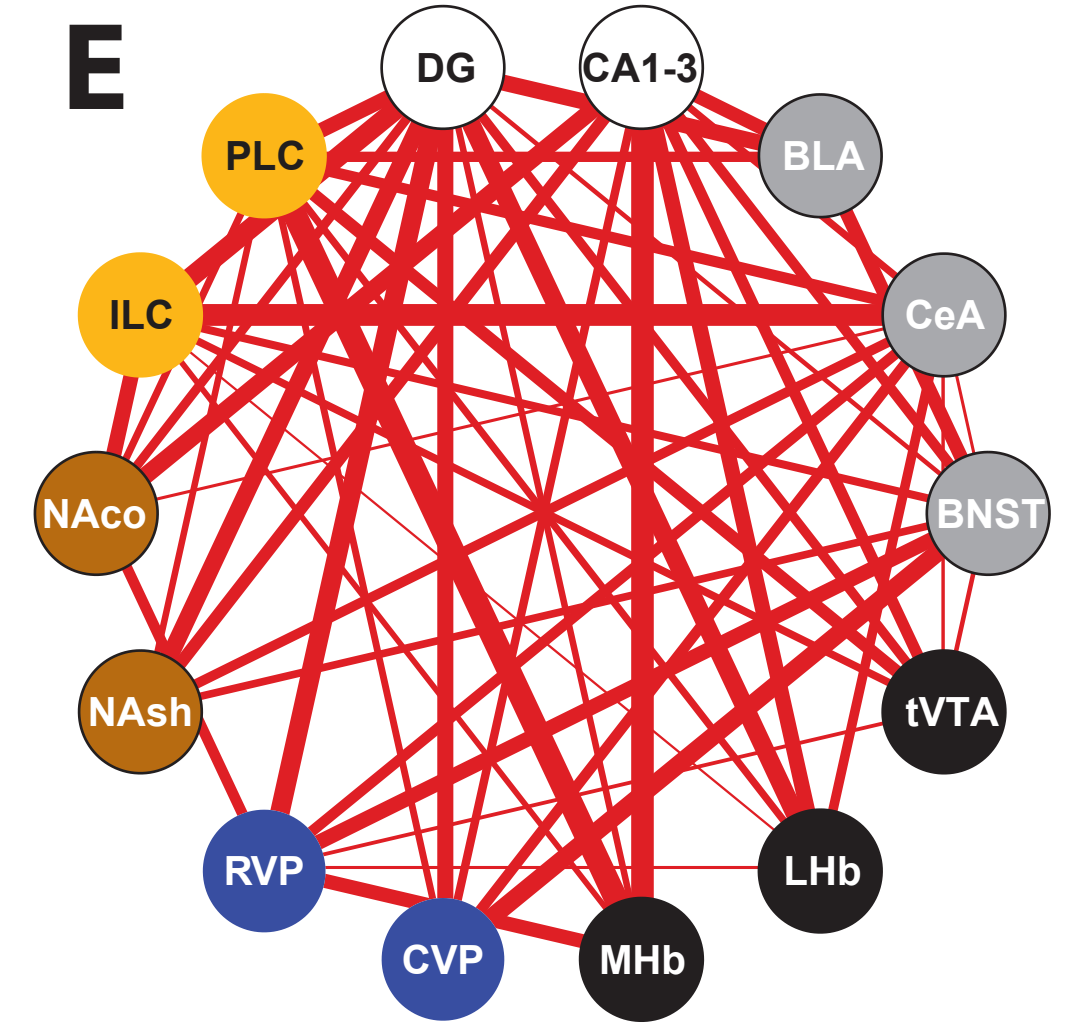

Males

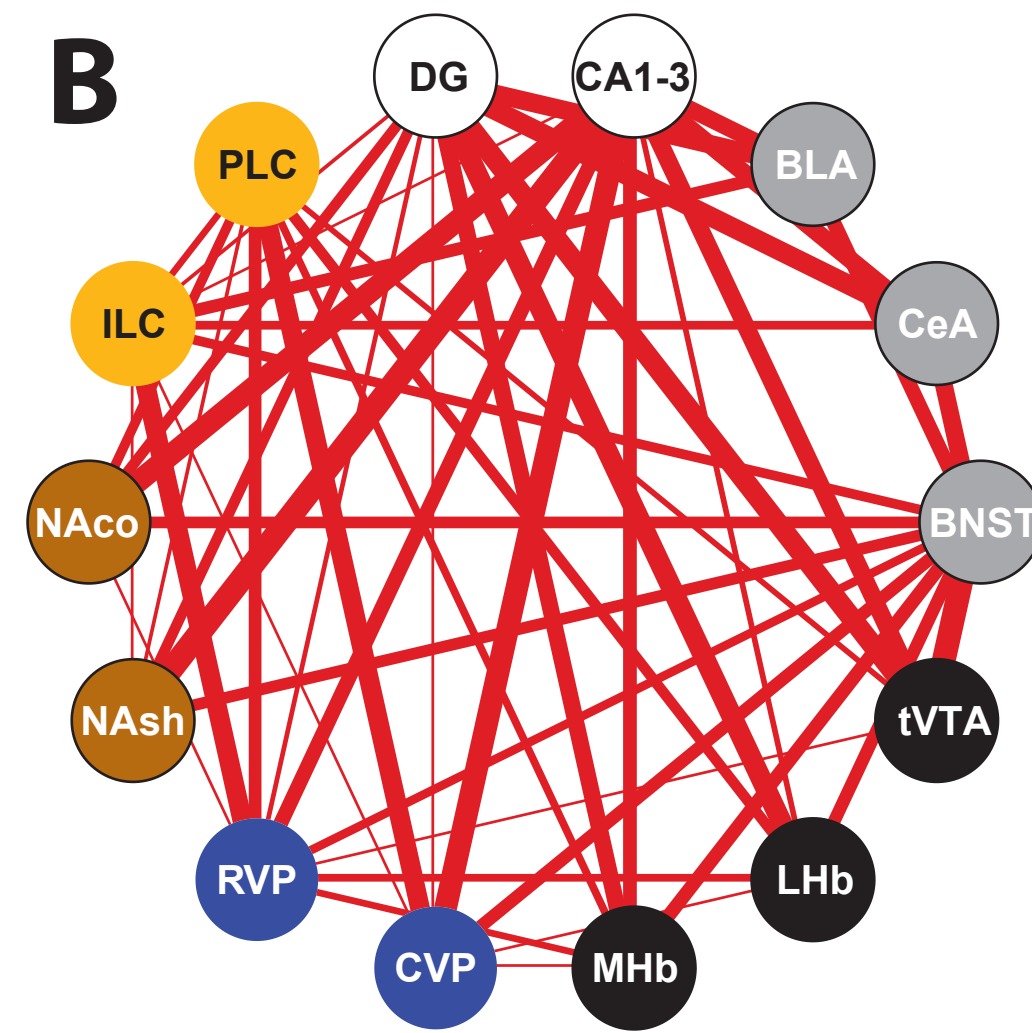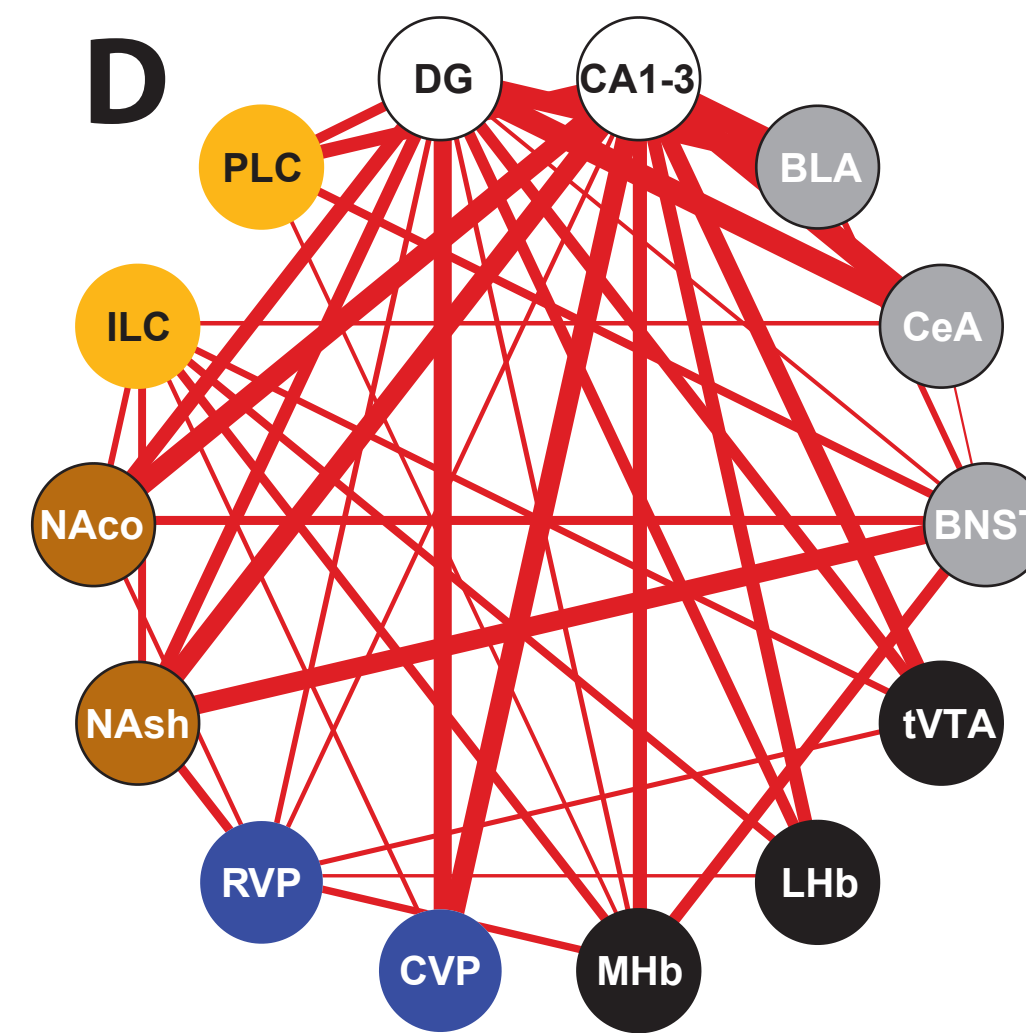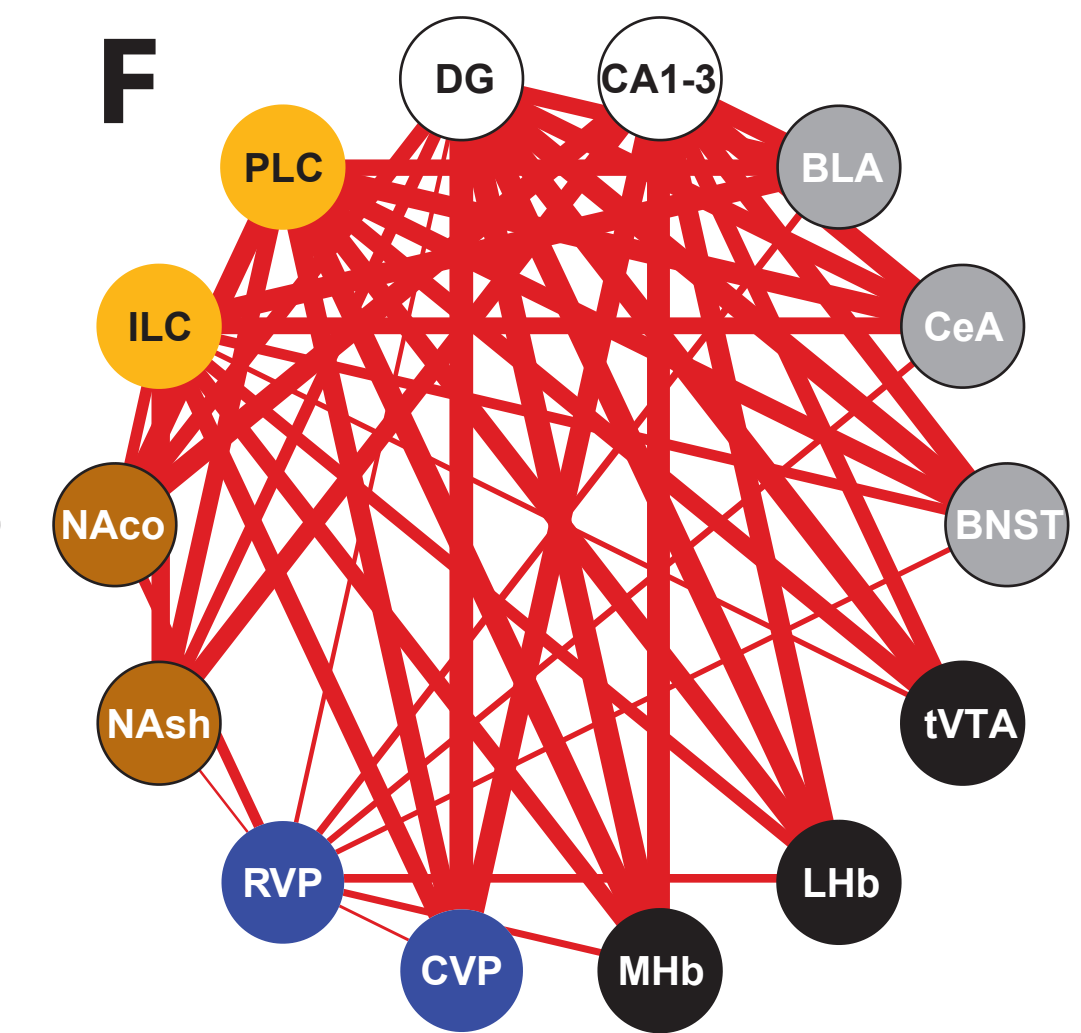

Accumbens  
mPFC

V. Pallidum  
Hippocampus

Epithalamus/tVTA  
Ext. Amygdala
