# Supplementary material
Source: PubMed Central journal article supplement (PMC8115040)
Supplement: 41386_2020_839_MOESM7_ESM.pdf [file 41386_2020_839_MOESM7_ESM.pdf]

**Table S1.** Maximal concentration ( $C_{\max}$ ) in plasma, time at which maximal concentration was reached ( $T_{\max}$ ), half-life of elimination ( $t_{1/2}$ ), and area under the curve (AUC) for  $\Delta^9$ -THC and its metabolites in adolescent male and female rats after IP injection of  $\Delta^9$ -THC (5 or 0.5 mg/kg). \*P < 0.5; \*\*P < 0.01. Student's *t*-test, n = 4.

| Analyte             | Dose<br>$\Delta^9$ -THC<br>(mg/kg) | Male                        |                     |                    |                        | Female                      |                     |                    |                        |
|---------------------|------------------------------------|-----------------------------|---------------------|--------------------|------------------------|-----------------------------|---------------------|--------------------|------------------------|
|                     |                                    | $C_{\max}$<br>(pmol/<br>mL) | $T_{\max}$<br>(min) | $t_{1/2}$<br>(min) | AUC<br>(pmol • min/mL) | $C_{\max}$<br>(pmol/<br>mL) | $T_{\max}$<br>(min) | $t_{1/2}$<br>(min) | AUC<br>(pmol • min/mL) |
| $\Delta^9$ -THC     | 0.5                                | 32                          | 60.00               | 140.9              | 6090                   | 21                          | 120.00              | 176.1              | 6389                   |
|                     | 5                                  | 437                         | 15.00               | 127.3              | 47445                  | 458                         | 30.00               | 119.9              | 79718                  |
| 11-OH-<br>THC       | 0.5                                | 2                           | 60.00               | -                  | 460                    | 6*                          | 120.00              | -                  | 1529*                  |
|                     | 5                                  | 41                          | 60.00               | -                  | 5127                   | 130*                        | 60.00               | -                  | 21311**                |
| 11-<br>COOH-<br>THC | 0.5                                | 6                           | 240.00              | -                  | 1704                   | 13**                        | 120.00              | -                  | 3994*                  |
|                     | 5                                  | 90                          | 60.00               | -                  | 15741                  | 201                         | 60.00               | -                  | 72136**                |
