# Supplementary material
Source: PubMed Central journal article supplement (PMC8115040)
Supplement: 41386_2020_839_MOESM8_ESM.pdf [file 41386_2020_839_MOESM8_ESM.pdf]

**Table S2.** Maximal concentration ( $C_{max}$ ) in brain, time at which maximal concentration was reached ( $T_{max}$ ), half-life of elimination ( $t_{1/2}$ ), and area under the curve (AUC) for  $\Delta^9$ -THC and its metabolites in adolescent male and female rats after IP injection of  $\Delta^9$ -THC (5 or 0.5 mg/kg). \* $P < 0.5$ ; \*\* $P < 0.01$ . Student's  $t$ -test,  $n = 4$ .

| Analyte             | Dose<br>$\Delta^9$ -THC<br>(mg/kg) | Male                       |                    |                    |                        | Female                     |                    |                    |                        |
|---------------------|------------------------------------|----------------------------|--------------------|--------------------|------------------------|----------------------------|--------------------|--------------------|------------------------|
|                     |                                    | $C_{max}$<br>(pmol/<br>mL) | $T_{max}$<br>(min) | $t_{1/2}$<br>(min) | AUC<br>(pmol • min/mL) | $C_{max}$<br>(pmol/<br>mL) | $T_{max}$<br>(min) | $t_{1/2}$<br>(min) | AUC<br>(pmol • min/mL) |
| $\Delta^9$ -THC     | 0.5                                | 65                         | 60.00              | 183.2              | 15999                  | 80                         | 120.00             | 206.9              | 22012                  |
|                     | 5                                  | 536                        | 60.00              | 265.9              | 126096                 | 769                        | 60.00              | 107.5              | 172025                 |
| 11-OH-<br>THC       | 0.5                                | 13                         | 60.00              | -                  | 3065                   | 40*                        | 120.00             | -                  | 9324*                  |
|                     | 5                                  | 236                        | 60.00              | -                  | 27764                  | 574                        | 60.00              | -                  | 89634*                 |
| 11-<br>COOH-<br>THC | 0.5                                | 8                          | 240.00             | -                  | 2323                   | 8                          | 120.00             | -                  | 3218                   |
|                     | 5                                  | 31                         | 60.00              | -                  | 6309                   | 86*                        | 480.00             | -                  | 28232**                |
