# Supplementary material
Source: PubMed Central journal article supplement (PMC8115040)
Supplement: 41386_2020_839_MOESM9_ESM.pdf [file 41386_2020_839_MOESM9_ESM.pdf]

**Table S3.** Brain-to-plasma ratio for  $\Delta^9$ -THC and its metabolites (11-OH-THC and 11-COOH-THC) from adolescent male and female rats after IP injection of  $\Delta^9$ -THC (0.5 or 5mg/kg). \*P < 0.5; \*\*P < 0.01. Student's *t*-test, n = 4.

| Analyte         | Dose<br>$\Delta^9$ -THC<br>(mg/kg) | Brain:Plasma |        |
|-----------------|------------------------------------|--------------|--------|
|                 |                                    | Male         | Female |
| $\Delta^9$ -THC | 0.5                                | 2.02         | 2.65   |
|                 | 5                                  | 2.49         | 3.77   |
| 11-OH-THC       | 0.5                                | 5.44         | 4.51   |
|                 | 5                                  | 5.68         | 6.25   |
| 11-COOH-THC     | 0.5                                | 0.76         | 0.55   |
|                 | 5                                  | 0.31         | 0.57   |
